# Supplementary material
Source: Springer Nature journal article supplement (https://www.springermedizin.de/resource/supplementary/13058_2008_2198_MOESM8_ESM.pdf/9700862)
Supplement: MOESM8 [file 9700862]

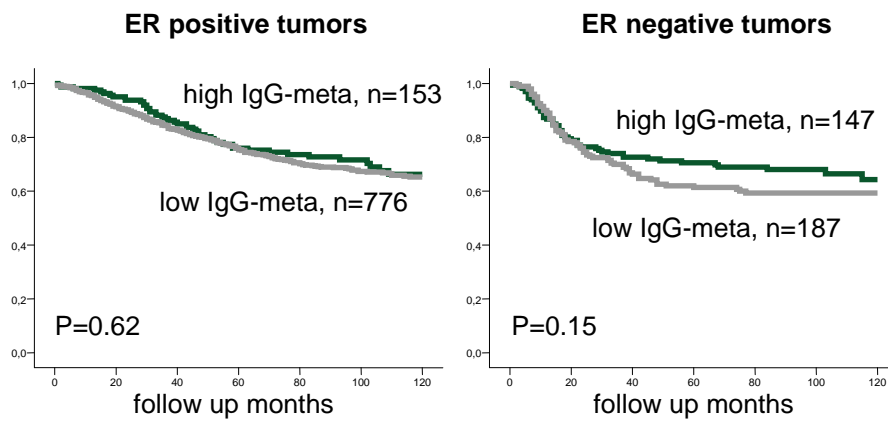

**Prognostic value of the IgG metagene in breast cancer patients.**

The samples of the combined dataset were stratified according to the highest quartile of expression of the IgG metagene. Kaplan Meier analyses of disease free survival were performed separately in ER positive and ER negative subgroups of tumors (n=1263).
